# Supplementary material for: The relationship between pomegranate root collar rot and the diversity of fungal communities in its rhizosphere
Source: Front Microbiol. 2025 Mar 21;16:1573724. doi: 10.3389/fmicb.2025.1573724 (PMC11968712; doi:10.3389/fmicb.2025.1573724)
Supplement: SUPPLEMENTARY Table 1 — Otu_core_spec.groups. [file Table_1.XLS]

HR	OTU741	OTU590	OTU86	OTU119	OTU317	OTU20	OTU736	OTU159	OTU1373	OTU214	OTU60	OTU665	OTU589	OTU251	OTU267	OTU138	OTU795	OTU276	OTU1873	OTU254	OTU412	OTU923	OTU343	OTU894	OTU196	OTU258	OTU399	OTU128	OTU210	OTU294	OTU635	OTU98	OTU445	OTU94	OTU552	OTU1254	OTU363	OTU526	OTU924	OTU339	OTU120	OTU642	OTU257	OTU553	OTU411	OTU462	OTU215	OTU1099	OTU336
DR	OTU741	OTU590	OTU86	OTU119	OTU1159	OTU317	OTU1579	OTU1578	OTU20	OTU437	OTU736	OTU159	OTU1373	OTU214	OTU271	OTU60	OTU665	OTU589	OTU1570	OTU251	OTU1571	OTU267	OTU138	OTU795	OTU276	OTU1873	OTU254	OTU613	OTU412	OTU923	OTU1156	OTU541	OTU343	OTU894	OTU196	OTU258	OTU399	OTU888	OTU386	OTU128	OTU210	OTU1378	OTU294	OTU635	OTU274	OTU851	OTU742	OTU98	OTU445
HS	OTU741	OTU590	OTU119	OTU1159	OTU317	OTU1579	OTU20	OTU736	OTU159	OTU214	OTU271	OTU60	OTU665	OTU589	OTU251	OTU267	OTU138	OTU795	OTU276	OTU1873	OTU254	OTU613	OTU412	OTU923	OTU1156	OTU541	OTU343	OTU196	OTU258	OTU399	OTU888	OTU386	OTU128	OTU210	OTU294	OTU635	OTU274	OTU851	OTU742	OTU98	OTU445	OTU94	OTU2291	OTU552	OTU1080	OTU1254	OTU363	OTU718	OTU277
DS	OTU86	OTU119	OTU317	OTU20	OTU736	OTU159	OTU214	OTU271	OTU60	OTU665	OTU589	OTU1570	OTU251	OTU267	OTU138	OTU795	OTU276	OTU1873	OTU254	OTU613	OTU412	OTU923	OTU1156	OTU541	OTU343	OTU196	OTU258	OTU399	OTU888	OTU386	OTU128	OTU210	OTU1378	OTU294	OTU635	OTU274	OTU851	OTU742	OTU98	OTU445	OTU94	OTU2291	OTU552	OTU1080	OTU1254	OTU363	OTU718	OTU277	OTU526
[truncated: 1,097 more columns]
